# Supplementary material for: Effects of covid-19 pandemic on life expectancy and premature mortality in 2020: time series analysis in 37 countries
Source: BMJ. 2021 Nov 3;375:e066768. doi: 10.1136/bmj-2021-066768 (PMC8564739; doi:10.1136/bmj-2021-066768)
Supplement: Supplementary file 1 — Supplementary information: additional information, tables, and figures [file isln066768.ww.pdf]

# Effects of Covid-19 pandemic on life expectancy and premature mortality in 2020: time series analysis in 37 countries

## Supplementary Materials

## Table of Contents

|                                                                                                                                                                                                                                                                     |    |
|---------------------------------------------------------------------------------------------------------------------------------------------------------------------------------------------------------------------------------------------------------------------|----|
| Supplemental data availability.....                                                                                                                                                                                                                                 | 2  |
| Supplementary methods: calculation of life expectancy.....                                                                                                                                                                                                          | 4  |
| Panel-I: Graphical presentation of potential incorrect conclusion on excess mortality in the context of an increasing or decreasing trend .....                                                                                                                     | 6  |
| Supplementary Table S1. Data availability in the Human Mortality Database as of August 2021.....                                                                                                                                                                    | 7  |
| Supplementary Figure S1. The difference in life expectancy in 2020 by age between estimates based on original granular STMF data and estimates based on (first aggregated and then) re-distributed death counts for five countries with detailed original data..... | 8  |
| Supplementary Figure S2. The difference in life expectancy in 2020 at ages 0, 15, 45, and 80 calculated using original granular data and life expectancy based on (first coarsely aggregated and then) re-distributed death counts. ....                            | 9  |
| Supplementary Table S2: Observed, expected and changes in life expectancy in 2020 in 37 high income countries .....                                                                                                                                                 | 10 |
| Supplementary Table S3: Observed, expected and changes in the years of life lost (per 100,000) in 2020 in 37 high income countries.....                                                                                                                             | 13 |
| Supplementary Table S4: Years of life lost per 100,000 in people <65 compared with people ≥65 years.....                                                                                                                                                            | 16 |
| Supplementary Figure S3: Life expectancy at birth, 2005-2020.....                                                                                                                                                                                                   | 18 |
| Supplementary Figure S4: Years of life lost (per 100,000) by age and sex, 2005-2020.....                                                                                                                                                                            | 19 |
| Fig. S4(A): Men .....                                                                                                                                                                                                                                               | 19 |
| Fig. S4(B): Women.....                                                                                                                                                                                                                                              | 20 |

## Supplemental data availability

We used data from the Human Mortality Database (HMD, [www.mortality.org](http://www.mortality.org)). For 2015, all calculations are based on annual data series that are available at the finest detail level: by one-year age group and open age interval 110+. Nevertheless, we used a 5-year age groups scale with an open age interval of 100+ (i.e., <1, 1-4, 5-9, ..., 95-99, 100+) for the sake of comparability to 2020 estimates.

For 2020, we used annual series in all cases where respective data were available (see Table S1). Belgium, Denmark, Finland, Norway, Portugal, and Russia had such extended data series. Data for the remaining 31 countries were completed using weekly death counts from the Short-Term Mortality Fluctuations data series (STMF, [www.mortality.org](http://www.mortality.org)) and population exposures based on Lee-Carter forecast as described in the Methods section. The standardized STMF data is available only by a broad age group 0-14, 15-64, 65-74, 75-84, 85+. Nevertheless, the STMF also provides the original death counts classified (in many cases) using more detailed age groups. Note, the age scale in the original data varies across countries (see Table S1, last column).

Most of the countries are using 5-year age groups but with the first age group from 0–4, instead of 0, and 1–4. Infant mortality is crucially important by the life table calculation. There are also six countries – Canada, Germany, Israel, New Zealand, South Korea, and the USA – with broad age groups (Table S1). There is no method for ungrouping coarsely aggregated data designed for the specific case of weekly death counts with elevated mortality due to pandemics.

The pattern of the COVID-19 deaths is very consistent across different settings in age groups below 65. [1] but excess mortality is often disproportionally concentrated at the old ages.[2,3] Thus, aggregated age groups were split using proportions from annual forecasted age-specific death counts (see details in the Methods section). To check the sensitivity of results to using the aggregated data, we do the following check.

First, we tested the importance of the first (infant mortality) and last age groups. For this analysis, we calculated life tables using five countries (England and Wales, France, Italy, Russia, and Scotland) with detailed data including infant mortality. Then, we aggregated the data in the first two age groups (<1 and 1–4) into one age group of 0–4, and made an open age interval of 90+. Using our standard method, we re-distributed aggregated age groups and re-calculated the life tables.

The difference in the estimated life expectancy produced by these two methods is presented in Figure S1, which shows that the difference between these two approaches was <0.01 for all ages below 80. Therefore, our approach of ungrouping coarsely aggregated data is robust.

Second, we tested the robustness of our methods for coarse age groups reported in Canada, Germany, Israel, New Zealand, South Korea, and the USA (Table S1). For this analysis, we used original data from the other 31 countries that had data by 5-year groups, and calculated the life tables. Then, we aggregated the data according to the age groups of the six countries with coarse age groups, and applied our method of ungrouping to re-calculate the life tables.

The boxplot (Figure S2) shows that the maximum difference produced by data aggregation is below 0.2 with the median close to zero; third and second quartiles are within the range of  $\pm 0.1$ . As expected, the biggest differences are observed in case of using most aggregated age scale (New Zealand, age groups 0-64, 65-79, 80+). At the same time, using age group 0-29 (age scale Germany) has only minor influence on life expectancy. Thus, the 2020 life expectancies calculated from STMF mortality data by aggregated age groups are virtually the same compared to LEs calculated from the originally granular STMF data.

### Supplementary methods: calculation of life expectancy

First, we converted the death rates,  ${}_n m_x$ , into probabilities of death,  ${}_n q_x$ . Here, index  $n$  refers to the length of the interval,  $x$  denotes the beginning of the age interval. For example,  ${}_n q_x$  denotes probability of death in age interval  $[x, x + n)$ .

Let,  ${}_n a_x$  be the average number of years lived within the age interval  $[x, x + n)$  for people dying at that age. We assume that  $a_x = \frac{n}{2}$  for all single-year ages except age 0 (see below). We then compute  ${}_n q_x$  from  ${}_n m_x$  and  ${}_n a_x$  according to the formula,

$${}_n q_x = \frac{{}_n m_x}{1 + (1 - {}_n a_x) \cdot {}_n m_x} \quad (1)$$

for  $x = 0, 1, 5, 10, \dots, 95$ . For the open age interval (100+), we set  ${}_{\infty} a_{100} = \frac{1}{{}_{\infty} m_{100}}$  and  ${}_{\infty} q_{100} = 1$ .

For infants <1 year of age, we used the formulas for  $a_0$  suggested by Preston *et al.*, [4] which are adapted from the Coale-Demeny model life tables. [5] Thus, if  $m_0 \geq 0.107$ :

$$a_0 = \begin{cases} 0.350 & \text{for women} \\ 0.330 & \text{for men} \end{cases} \quad (2)$$

On the other hand, if  $m_0 < 0.107$ :

$$a_0 = \begin{cases} 0.053 + 2.800 \cdot m_0 & \text{for women} \\ 0.045 + 2.684 \cdot m_0 & \text{for men} \end{cases} \quad (3)$$

To complete the life table calculation, let  ${}_n p_x$  be the probability of surviving from age  $x$  to  $x + n$ . Therefore,

$${}_n p_x = 1 - {}_n q_x \quad (4)$$

for all ages  $x$ . Let the radix (the starting number of new-borns) of the life table be  $l_0 = 100,000$ . Then, the number of survivors (out of 100,000) at age  $x$  is

$$l_x = l_0 \cdot \prod_{i=0}^{x-1} {}_1 p_i \quad (5)$$

The distribution of deaths by age in the life-table population is

$${}_n d_x = l_x \cdot {}_n q_x \quad (6)$$

for  $x = 0, 1, 5, \dots, 95$ . For the open age category,  ${}_{\infty} d_{100} = l_{100}$ .

The person-years lived by the life-table population in the age interval  $[x, x + n)$  are

$${}_n L_x = l_x - (1 - {}_n a_x) \cdot {}_n d_x \quad (7)$$

for  $x = 0, 1, 5, \dots, 95$ . For the open age category,  ${}_{\infty} L_{100} = l_{100} \cdot a_{100}$ . The person-years remaining for individuals of age  $x$  equal

$$T_x = \sum_{i=x}^{95} L_i + {}_{\infty}L_{100} \quad (8)$$

for  $x = 0, 1, 5, \dots, 95$ . Remaining life expectancy at age  $x$  is

$$e_x = \frac{T_x}{l_x} \quad (9)$$

for  $x = 0, 1, 5, \dots, 95$ .

Confidence intervals for the forecasted life expectancy and YLL were calculated using the approach proposed by Chiang.[6] This approach requires known distribution of age-specific probabilities of death. We derived these distributions using confidence intervals for mortality rates returned by Lee-Carter forecast. For the Lee-Carter forecast and calculation respective confidence limits for mortality rates we used R package demography.

## Panel-I: Graphical presentation of potential incorrect conclusion on excess mortality in the context of an increasing or decreasing trend

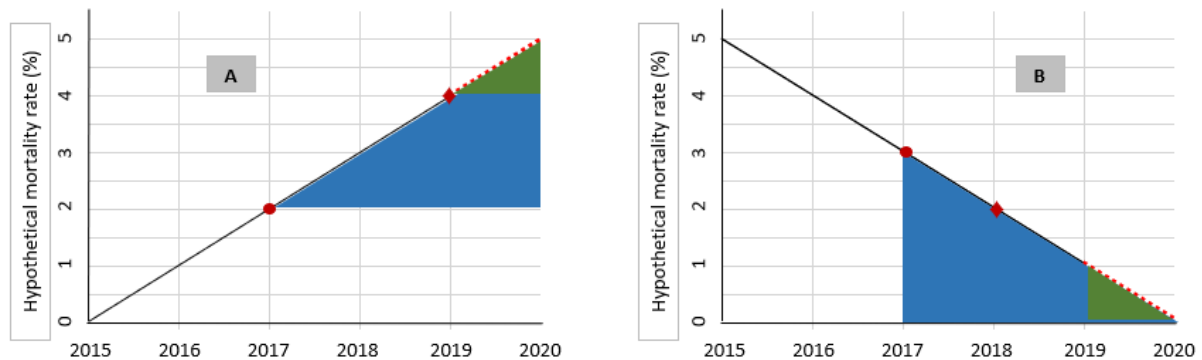

**Panel I:** (A) shows an increasing trend of a hypothetical mortality rate (%) from 0 to 4 between 2015 and 2019. Therefore, the most reasonable 'expected' value in 2020 will be approximately 5 (red dotted line). However, if the observed value in 2020 is  $>2$  but  $<5$  (in the blue or green shaded area), and if we compare this with the 2015-2019 average value of 2, we will incorrectly conclude that the observed value in 2020 was higher than the expected. If the observed value in 2020 is  $>4$  but  $<5$  (green-shaded area), we may incorrectly conclude that the observed was higher than expected if we compared with the 2019 value of 4. An analogous example of a decreasing trend is shown in (B). The reasonable expected value in 2020 is 0 (red dotted line), while the 2015-2019 average is 3. Therefore, any observed value of  $>0$  &  $<3$  would lead to an incorrect conclusion that there was a decrease in 2020. Similarly, any observed value  $>0$  &  $<1$  would lead to an incorrect conclusion that there was a decrease in 2020 if we compared this with the 2019 estimate of 1. Both of these examples illustrate how we can make an incorrect conclusion if we ignore the recent temporal trend (e.g., a gradual improvement in life expectancy over the last decades).

Supplementary Table S1. Data availability in the Human Mortality Database as of August 2021

| Country           | Last year in the HMD core | STMF age scale in 2020                   |
|-------------------|---------------------------|------------------------------------------|
| Austria           | 2019                      | 0-4, 5-9, ..., 85-89, 90+                |
| Belgium           | 2020                      | 0-4, 5-9, ..., 85-89, 90+                |
| Bulgaria          | 2017                      | 0-4, 5-9, ..., 85-89, 90+                |
| Canada            | 2018                      | 0-44, 45-64, 65-84, 85+                  |
| Chile             | 2017                      | 0-4, 5-9, ..., 85-89, 90-94, 95+         |
| Croatia           | 2019                      | 0-4, 5-9, ..., 85-89, 90+                |
| Czech Republic    | 2019                      | 0-4, 5-9, ..., 85-89, 90+                |
| Denmark           | 2020                      | 0-4, 5-9, ..., 85-89, 90-94, 95-99, 100+ |
| England and Wales | 2018                      | 0, 1-4, 5-9, ..., 85-89, 90+             |
| Estonia           | 2019                      | 0-4, 5-9, ..., 85-89, 90+                |
| Finland           | 2020                      | 0-4, 5-9, ..., 85-89, 90+                |
| France            | 2019                      | 0, 1-4, 5-9, ..., 85-89, 90-94, 95+      |
| Germany           | 2017                      | 0-29, 30-34, 35-39, ..., 90-94, 95+      |
| Greece            | 2019                      | 0-4, 5-9, ..., 85-89, 90+                |
| Hungary           | 2019                      | 0-4, 5-9, ..., 85-89, 90+                |
| Iceland           | 2018                      | 0-4, 5-9, ..., 85-89, 90+                |
| Israel            | 2019                      | 0-19, 20-29, ..., , 70-79, 80+           |
| Italy             | 2018                      | 0, 1-4, 5-9,..., 95-99, 100              |
| Latvia            | 2019                      | 0-4, 5-9, ..., 85-89, 90+                |
| Lithuania         | 2019                      | 0-4, 5-9, ..., 85-89, 90+                |
| Luxembourg        | 2019                      | 0-4, 5-9, ..., 85-89, 90+                |
| Northern Ireland  | 2018                      | 0-4, 5-9, ..., 85-89, 90+                |
| Netherlands       | 2019                      | 0-4, 5-9, ..., 85-89, 90+                |
| New Zealand       | 2019                      | 0-64, 65-79, 80+                         |
| Norway            | 2020                      | 0-4, 5-9, ..., 85-89, 90-94, 95-99, 100+ |
| Poland            | 2019                      | 0-4, 5-9, ..., 85-89, 90+                |
| Portugal          | 2020                      | 0-4, 5-9, ..., 85-89, 90+                |
| Russia            | 2020                      | 0, 1-4, 5-9,..., 90-94, 95+              |
| South Korea       | 2018                      | 0,15,65,75,85                            |
| Scotland          | 2018                      | 0, 1-4, 5-9,..., 90-94, 95+              |
| Slovakia          | 2019                      | 0-4, 5-9, ..., 85-89, 90+                |
| Slovenia          | 2019                      | 0-4, 5-9, ..., 85-89, 90+                |
| Spain             | 2018                      | 0-4, 5-9, ..., 85-89, 90+                |
| Sweden            | 2019                      | 0-4, 5-9, ..., 85-89, 90+                |
| Switzerland       | 2018                      | 0-4, 5-9, ..., 85-89, 90+                |
| Taiwan            | 2019                      | 0-4, 5-9, ..., 85-89, 90-94, 95-99, 100+ |
| USA               | 2019                      | 0, 1-4, 5-14, 15-24,...,75-84,85+        |

HMD core: Human mortality core database ([www.mortality.org](http://www.mortality.org)). STMF: Short-Term Mortality Fluctuations data series (STMF, [www.mortality.org](http://www.mortality.org))

Supplementary Figure S1. The difference in life expectancy in 2020 by age between estimates based on original granular STMF data and estimates based on (first aggregated and then) re-distributed death counts for five countries with detailed original data.

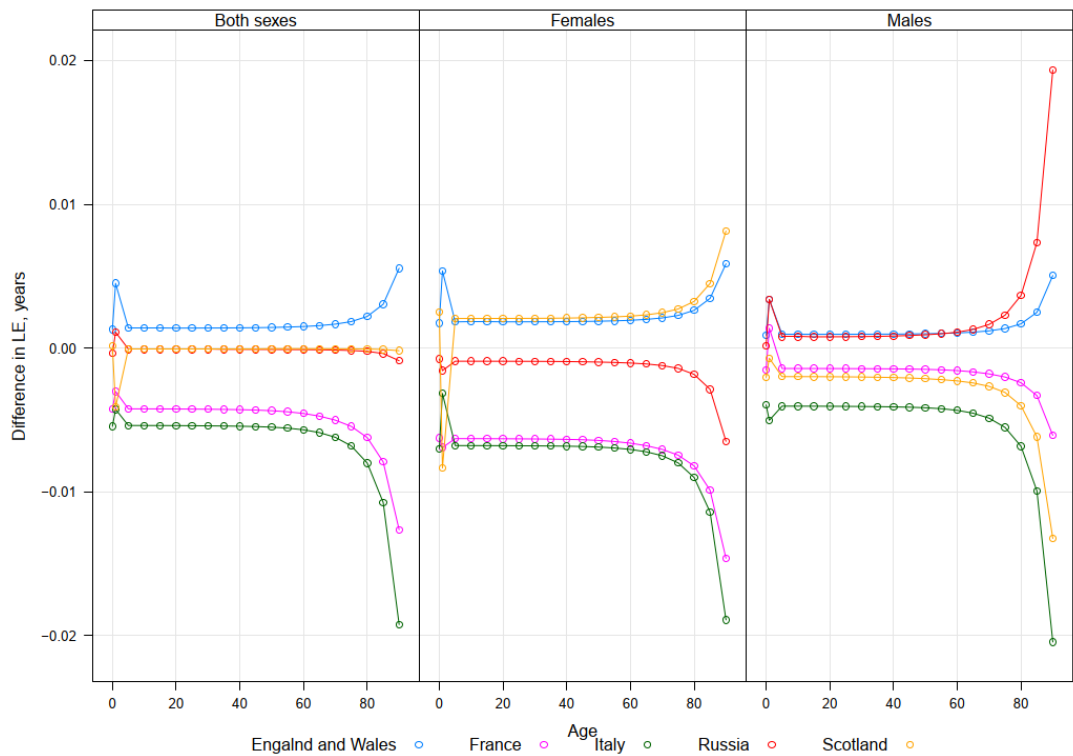

Notes: Original granular age groups: 0, 1-4, 5-9, 10-14, ..., 100+  
 Simulated age scale: 0-4, ..., 84-85, 90+

Supplementary Figure S2. The difference in life expectancy in 2020 at ages 0, 15, 45, and 80 calculated using original granular data and life expectancy based on (first coarsely aggregated and then) re-distributed death counts.

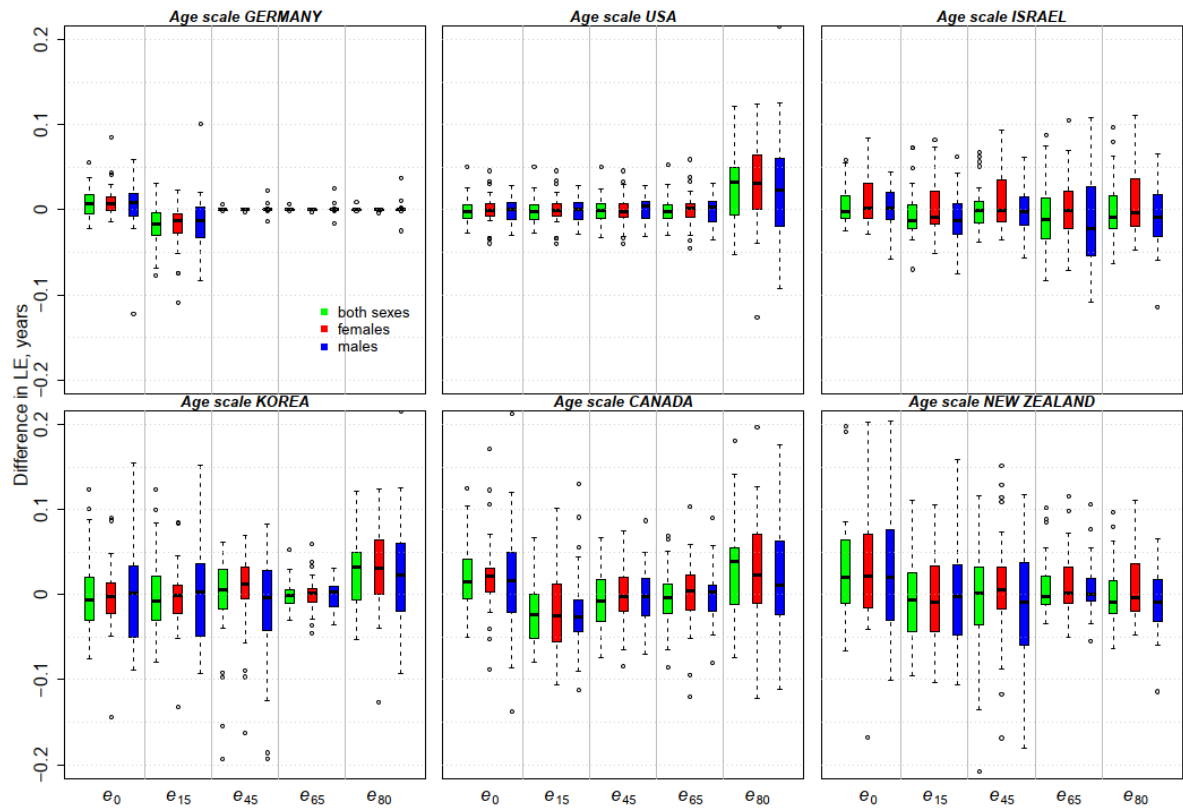

Notes: Simulated age scales are named after countries that use them (see Table S1).

Calculations on STMF data for 31 countries with the originally granular data in STMF: Austria, Belgium, Bulgaria, Chile, Croatia, Czechia, Denmark, England and Wales, Estonia, Finland, France, Greece, Hungary, Iceland, Italy, Latvia, Lithuania, Luxembourg, Northern Ireland, Netherlands, Norway, Poland, Portugal, Russia, Scotland, Slovakia, Slovenia, Spain, Sweden, Switzerland, Taiwan.

Supplementary Table S2: Observed, expected and changes in life expectancy in 2020 in 37 high income countries

| Country         | Sex    | Observed | Expected (95% CI)      | Difference (95% CI)    |
|-----------------|--------|----------|------------------------|------------------------|
| Austria         | Total  | 81.32    | 82.08 (81.9 to 82.26)  | -0.76 (-0.94 to -0.59) |
| Austria         | Female | 83.7     | 84.33 (84.21 to 84.45) | -0.62 (-0.75 to -0.51) |
| Austria         | Male   | 78.91    | 79.75 (79.62 to 79.87) | -0.84 (-0.96 to -0.72) |
| Belgium         | Total  | 80.78    | 82.02 (81.84 to 82.2)  | -1.24 (-1.42 to -1.06) |
| Belgium         | Female | 83.03    | 84.14 (83.99 to 84.29) | -1.11 (-1.26 to -0.96) |
| Belgium         | Male   | 78.52    | 79.82 (79.72 to 79.93) | -1.31 (-1.42 to -1.2)  |
| Bulgaria        | Total  | 73.53    | 75.28 (74.94 to 75.62) | -1.75 (-2.09 to -1.41) |
| Bulgaria        | Female | 77.42    | 78.79 (78.42 to 79.16) | -1.37 (-1.74 to -1.01) |
| Bulgaria        | Male   | 69.91    | 71.87 (71.72 to 72.03) | -1.96 (-2.11 to -1.81) |
| Canada          | Total  | 81.61    | 82.38 (82.18 to 82.58) | -0.77 (-0.98 to -0.58) |
| Canada          | Female | 83.89    | 84.38 (84.27 to 84.49) | -0.49 (-0.6 to -0.38)  |
| Canada          | Male   | 79.34    | 80.35 (80.2 to 80.5)   | -1.01 (-1.16 to -0.86) |
| Switzerland     | Total  | 83.06    | 83.91 (83.62 to 84.2)  | -0.84 (-1.14 to -0.55) |
| Switzerland     | Female | 85.04    | 85.61 (85.47 to 85.75) | -0.57 (-0.71 to -0.43) |
| Switzerland     | Male   | 81.04    | 82.09 (81.87 to 82.32) | -1.05 (-1.28 to -0.83) |
| Chile           | Total  | 80.08    | 81.39 (80.9 to 81.9)   | -1.31 (-1.82 to -0.81) |
| Chile           | Female | 83.05    | 83.94 (83.56 to 84.34) | -0.88 (-1.28 to -0.5)  |
| Chile           | Male   | 77.03    | 78.67 (78.34 to 78.99) | -1.64 (-1.97 to -1.32) |
| Czech Republic  | Total  | 78.33    | 79.45 (79.27 to 79.62) | -1.12 (-1.3 to -0.95)  |
| Czech Republic  | Female | 81.36    | 82.29 (82.15 to 82.44) | -0.94 (-1.09 to -0.79) |
| Czech Republic  | Male   | 75.33    | 76.58 (76.48 to 76.69) | -1.26 (-1.36 to -1.15) |
| Germany         | Total  | 81.02    | 81.35 (81.01 to 81.7)  | -0.33 (-0.68 to 0.02)  |
| Germany         | Female | 83.43    | 83.6 (83.31 to 83.89)  | -0.17 (-0.46 to 0.12)  |
| Germany         | Male   | 78.62    | 79.08 (78.87 to 79.29) | -0.46 (-0.67 to -0.25) |
| Denmark         | Total  | 81.55    | 81.64 (81.49 to 81.79) | -0.09 (-0.24 to 0.06)  |
| Denmark         | Female | 83.51    | 83.6 (83.48 to 83.71)  | -0.09 (-0.2 to 0.03)   |
| Denmark         | Male   | 79.58    | 79.68 (79.58 to 79.77) | -0.09 (-0.19 to 0)     |
| England & Wales | Total  | 80.63    | 81.65 (81.41 to 81.9)  | -1.02 (-1.27 to -0.78) |
| England & Wales | Female | 82.62    | 83.42 (83.24 to 83.62) | -0.8 (-0.99 to -0.62)  |
| England & Wales | Male   | 78.65    | 79.85 (79.69 to 80)    | -1.2 (-1.35 to -1.04)  |
| Spain           | Total  | 82.29    | 83.56 (83.28 to 83.85) | -1.27 (-1.57 to -0.99) |
| Spain           | Female | 85.01    | 86.13 (85.9 to 86.38)  | -1.13 (-1.37 to -0.9)  |
| Spain           | Male   | 79.55    | 80.9 (80.73 to 81.08)  | -1.35 (-1.53 to -1.18) |
| Estonia         | Total  | 78.47    | 79.13 (78.81 to 79.47) | -0.66 (-1 to -0.34)    |
| Estonia         | Female | 82.45    | 82.97 (82.88 to 83.06) | -0.52 (-0.61 to -0.43) |
| Estonia         | Male   | 74.1     | 74.85 (74.6 to 75.1)   | -0.75 (-1 to -0.5)     |
| Finland         | Total  | 81.85    | 82.05 (81.92 to 82.19) | -0.2 (-0.33 to -0.07)  |
| Finland         | Female | 84.62    | 84.66 (84.56 to 84.76) | -0.03 (-0.13 to 0.06)  |
| Finland         | Male   | 79.07    | 79.41 (79.32 to 79.49) | -0.34 (-0.42 to -0.25) |
| France          | Total  | 82.23    | 82.9 (82.74 to 83.07)  | -0.67 (-0.84 to -0.51) |
| France          | Female | 85.18    | 85.71 (85.58 to 85.84) | -0.53 (-0.66 to -0.4)  |

|                  |        |       |                        |                        |
|------------------|--------|-------|------------------------|------------------------|
| France           | Male   | 79.2  | 79.95 (79.84 to 80.06) | -0.75 (-0.86 to -0.64) |
| Greece           | Total  | 81.2  | 81.61 (81.36 to 81.87) | -0.41 (-0.67 to -0.16) |
| Greece           | Female | 83.74 | 84.08 (83.89 to 84.29) | -0.34 (-0.55 to -0.15) |
| Greece           | Male   | 78.63 | 79.09 (78.93 to 79.25) | -0.46 (-0.61 to -0.3)  |
| Croatia          | Total  | 77.77 | 78.61 (78.35 to 78.88) | -0.84 (-1.11 to -0.58) |
| Croatia          | Female | 80.88 | 81.59 (81.39 to 81.79) | -0.72 (-0.92 to -0.51) |
| Croatia          | Male   | 74.66 | 75.58 (75.42 to 75.76) | -0.92 (-1.09 to -0.75) |
| Hungary          | Total  | 75.73 | 76.64 (76.46 to 76.82) | -0.91 (-1.09 to -0.73) |
| Hungary          | Female | 79.03 | 79.82 (79.67 to 79.97) | -0.79 (-0.94 to -0.64) |
| Hungary          | Male   | 72.32 | 73.29 (73.19 to 73.39) | -0.97 (-1.07 to -0.87) |
| Iceland          | Total  | 82.85 | 82.95 (82.35 to 83.61) | -0.11 (-0.77 to 0.5)   |
| Iceland          | Female | 84.41 | 84.36 (83.97 to 84.75) | 0.05 (-0.34 to 0.44)   |
| Iceland          | Male   | 81.33 | 81.59 (81.13 to 82.07) | -0.26 (-0.74 to 0.19)  |
| Israel           | Total  | 82.76 | 83.13 (82.96 to 83.3)  | -0.37 (-0.54 to -0.2)  |
| Israel           | Female | 84.77 | 84.93 (84.84 to 85.03) | -0.16 (-0.26 to -0.07) |
| Israel           | Male   | 80.66 | 81.23 (81.09 to 81.36) | -0.57 (-0.7 to -0.43)  |
| Italy            | Total  | 82.15 | 83.49 (83.14 to 83.87) | -1.35 (-1.72 to -0.99) |
| Italy            | Female | 84.45 | 85.5 (85.22 to 85.78)  | -1.05 (-1.33 to -0.77) |
| Italy            | Male   | 79.78 | 81.34 (81.12 to 81.57) | -1.56 (-1.8 to -1.34)  |
| South Korea      | Total  | 83.73 | 83.62 (83.43 to 83.82) | 0.11 (-0.09 to 0.3)    |
| South Korea      | Female | 86.59 | 86.45 (86.3 to 86.59)  | 0.14 (0 to 0.29)       |
| South Korea      | Male   | 80.63 | 80.57 (80.45 to 80.7)  | 0.06 (-0.06 to 0.18)   |
| Lithuania        | Total  | 75.08 | 76.69 (76.37 to 77)    | -1.61 (-1.92 to -1.29) |
| Lithuania        | Female | 80.02 | 81.22 (81.06 to 81.38) | -1.21 (-1.36 to -1.05) |
| Lithuania        | Male   | 70.05 | 71.87 (71.64 to 72.11) | -1.83 (-2.07 to -1.59) |
| Luxembourg       | Total  | 82.07 | 82.53 (82.13 to 83)    | -0.46 (-0.93 to -0.07) |
| Luxembourg       | Female | 84.35 | 84.9 (84.64 to 85.19)  | -0.55 (-0.84 to -0.28) |
| Luxembourg       | Male   | 79.81 | 80.17 (79.88 to 80.46) | -0.35 (-0.64 to -0.07) |
| Latvia           | Total  | 75.43 | 75.9 (75.61 to 76.18)  | -0.47 (-0.76 to -0.18) |
| Latvia           | Female | 79.94 | 80.24 (80.07 to 80.4)  | -0.3 (-0.46 to -0.14)  |
| Latvia           | Male   | 70.61 | 71.19 (71 to 71.38)    | -0.58 (-0.77 to -0.39) |
| Northern Ireland | Total  | 80.14 | 81 (80.59 to 81.43)    | -0.86 (-1.28 to -0.45) |
| Northern Ireland | Female | 82.02 | 82.64 (82.42 to 82.87) | -0.62 (-0.85 to -0.4)  |
| Northern Ireland | Male   | 78.23 | 79.3 (78.99 to 79.62)  | -1.07 (-1.39 to -0.76) |
| Netherlands      | Total  | 81.36 | 82.23 (82.07 to 82.38) | -0.87 (-1.03 to -0.72) |
| Netherlands      | Female | 83.03 | 83.69 (83.59 to 83.79) | -0.66 (-0.76 to -0.56) |
| Netherlands      | Male   | 79.67 | 80.7 (80.59 to 80.81)  | -1.03 (-1.14 to -0.92) |
| Norway           | Total  | 83.2  | 83.13 (83.03 to 83.23) | 0.07 (-0.03 to 0.17)   |
| Norway           | Female | 84.87 | 84.81 (84.73 to 84.88) | 0.07 (-0.01 to 0.14)   |
| Norway           | Male   | 81.5  | 81.43 (81.37 to 81.49) | 0.06 (0.00 to 0.13)    |
| New Zealand      | Total  | 82.68 | 82.02 (81.79 to 82.26) | 0.66 (0.41 to 0.89)    |
| New Zealand      | Female | 84.44 | 83.82 (83.65 to 83.99) | 0.62 (0.45 to 0.79)    |
| New Zealand      | Male   | 80.86 | 80.19 (80.04 to 80.35) | 0.67 (0.51 to 0.82)    |
| Poland           | Total  | 76.76 | 78.12 (77.93 to 78.31) | -1.36 (-1.55 to -1.17) |
| Poland           | Female | 80.88 | 81.9 (81.77 to 82.03)  | -1.02 (-1.16 to -0.89) |
| Poland           | Male   | 72.76 | 74.3 (74.17 to 74.43)  | -1.54 (-1.67 to -1.41) |

|               |        |       |                        |                        |
|---------------|--------|-------|------------------------|------------------------|
| Portugal      | Total  | 81.04 | 81.92 (81.74 to 82.1)  | -0.88 (-1.06 to -0.7)  |
| Portugal      | Female | 83.98 | 84.75 (84.58 to 84.92) | -0.78 (-0.94 to -0.61) |
| Portugal      | Male   | 77.93 | 78.86 (78.77 to 78.96) | -0.93 (-1.03 to -0.84) |
| Russia        | Total  | 71.48 | 73.8 (73.59 to 74.04)  | -2.32 (-2.55 to -2.11) |
| Russia        | Female | 76.36 | 78.5 (78.39 to 78.61)  | -2.14 (-2.25 to -2.03) |
| Russia        | Male   | 66.45 | 68.78 (68.62 to 68.95) | -2.33 (-2.5 to -2.17)  |
| Scotland      | Total  | 78.45 | 79.36 (79.09 to 79.65) | -0.91 (-1.2 to -0.63)  |
| Scotland      | Female | 80.72 | 81.26 (81.09 to 81.43) | -0.54 (-0.71 to -0.36) |
| Scotland      | Male   | 76.18 | 77.42 (77.2 to 77.63)  | -1.24 (-1.45 to -1.03) |
| Slovakia      | Total  | 76.97 | 77.92 (77.72 to 78.11) | -0.94 (-1.14 to -0.75) |
| Slovakia      | Female | 80.36 | 81.21 (81.07 to 81.36) | -0.85 (-1.00 to -0.70) |
| Slovakia      | Male   | 73.53 | 74.53 (74.4 to 74.65)  | -1.00 (-1.12 to -0.88) |
| Slovenia      | Total  | 80.55 | 81.61 (81.37 to 81.86) | -1.06 (-1.31 to -0.82) |
| Slovenia      | Female | 83.39 | 84.41 (84.25 to 84.57) | -1.02 (-1.18 to -0.86) |
| Slovenia      | Male   | 77.76 | 78.8 (78.64 to 78.97)  | -1.04 (-1.21 to -0.88) |
| Sweden        | Total  | 82.46 | 83.21 (83.08 to 83.34) | -0.75 (-0.88 to -0.62) |
| Sweden        | Female | 84.31 | 84.85 (84.75 to 84.94) | -0.54 (-0.63 to -0.45) |
| Sweden        | Male   | 80.66 | 81.56 (81.47 to 81.64) | -0.90 (-0.99 to -0.81) |
| Taiwan        | Total  | 81.18 | 80.83 (80.64 to 81.04) | 0.35 (0.14 to 0.54)    |
| Taiwan        | Female | 84.34 | 84.05 (83.91 to 84.18) | 0.3 (0.17 to 0.43)     |
| Taiwan        | Male   | 78.13 | 77.75 (77.61 to 77.88) | 0.38 (0.25 to 0.52)    |
| United States | Total  | 77.28 | 79.27 (79.1 to 79.44)  | -1.98 (-2.16 to -1.82) |
| United States | Female | 80.21 | 81.82 (81.73 to 81.91) | -1.61 (-1.7 to -1.51)  |
| United States | Male   | 74.44 | 76.71 (76.59 to 76.83) | -2.27 (-2.39 to -2.15) |

Supplementary Table S3: Observed, expected and changes in the years of life lost (per 100,000) in 2020 in 37 high income countries

| Country         | Sex    | Observed | Expected (95% CI)      | Difference (95% CI) |
|-----------------|--------|----------|------------------------|---------------------|
| Austria         | Total  | 16700    | 15500 (15200 to 15800) | 1230 (941 to 1520)  |
| Austria         | Female | 14200    | 13200 (13000 to 13400) | 936 (755 to 1130)   |
| Austria         | Male   | 19400    | 17800 (17600 to 18100) | 1540 (1310 to 1780) |
| Belgium         | Total  | 17600    | 15500 (15200 to 15800) | 2040 (1770 to 2330) |
| Belgium         | Female | 15300    | 13500 (13300 to 13800) | 1710 (1490 to 1920) |
| Belgium         | Male   | 20000    | 17600 (17400 to 17800) | 2390 (2190 to 2580) |
| Bulgaria        | Total  | 35500    | 30100 (29100 to 31000) | 5440 (4460 to 6420) |
| Bulgaria        | Female | 28100    | 24400 (23400 to 25400) | 3730 (2740 to 4730) |
| Bulgaria        | Male   | 43400    | 36100 (35600 to 36500) | 7260 (6820 to 7710) |
| Canada          | Total  | 15400    | 14200 (14000 to 14500) | 1120 (870 to 1380)  |
| Canada          | Female | 12800    | 12200 (12100 to 12300) | 625 (496 to 754)    |
| Canada          | Male   | 17900    | 16300 (16100 to 16500) | 1640 (1420 to 1850) |
| Switzerland     | Total  | 13500    | 12400 (12000 to 12900) | 1110 (682 to 1520)  |
| Switzerland     | Female | 11800    | 11100 (10900 to 11300) | 723 (537 to 914)    |
| Switzerland     | Male   | 15300    | 13800 (13400 to 14100) | 1520 (1160 to 1870) |
| Chile           | Total  | 14500    | 12800 (12200 to 13300) | 1740 (1160 to 2310) |
| Chile           | Female | 11500    | 10400 (10100 to 10800) | 1060 (701 to 1430)  |
| Chile           | Male   | 17600    | 15200 (14700 to 15600) | 2430 (1990 to 2870) |
| Czech Republic  | Total  | 21900    | 19500 (19100 to 19800) | 2380 (2020 to 2730) |
| Czech Republic  | Female | 17800    | 16000 (15700 to 16200) | 1810 (1540 to 2080) |
| Czech Republic  | Male   | 26100    | 23100 (22900 to 23300) | 2970 (2740 to 3200) |
| Germany         | Total  | 19300    | 18700 (18000 to 19400) | 570 (-146 to 1290)  |
| Germany         | Female | 16400    | 16200 (15600 to 16700) | 256 (-303 to 847)   |
| Germany         | Male   | 22200    | 21300 (20800 to 21700) | 893 (438 to 1340)   |
| Denmark         | Total  | 16000    | 15800 (15500 to 16100) | 138 (-126 to 407)   |
| Denmark         | Female | 13800    | 13700 (13500 to 13900) | 160 (-29 to 350)    |
| Denmark         | Male   | 18100    | 18000 (17800 to 18200) | 115 (-76 to 303)    |
| England & Wales | Total  | 17100    | 15400 (15000 to 15800) | 1670 (1300 to 2060) |
| England & Wales | Female | 14800    | 13600 (13400 to 13900) | 1210 (944 to 1470)  |
| England & Wales | Male   | 19300    | 17200 (16900 to 17500) | 2140 (1880 to 2410) |
| Spain           | Total  | 15800    | 13900 (13500 to 14300) | 1920 (1500 to 2340) |
| Spain           | Female | 13000    | 11400 (11100 to 11700) | 1560 (1260 to 1870) |
| Spain           | Male   | 18800    | 16500 (16200 to 16800) | 2280 (1990 to 2580) |
| Estonia         | Total  | 22400    | 21100 (20400 to 21700) | 1330 (676 to 1980)  |
| Estonia         | Female | 17900    | 16900 (16800 to 17100) | 933 (766 to 1100)   |
| Estonia         | Male   | 27400    | 25600 (25100 to 26200) | 1790 (1220 to 2370) |
| Finland         | Total  | 16700    | 16400 (16100 to 16600) | 315 (84 to 545)     |
| Finland         | Female | 13600    | 13500 (13400 to 13700) | 74 (-77 to 228)     |
| Finland         | Male   | 19800    | 19300 (19100 to 19400) | 561 (385 to 737)    |
| France          | Total  | 15900    | 15000 (14700 to 15200) | 971 (743 to 1210)   |
| France          | Female | 12800    | 12100 (12000 to 12300) | 700 (540 to 856)    |

|                  |        |       |                        |                      |
|------------------|--------|-------|------------------------|----------------------|
| France           | Male   | 19200 | 18000 (17800 to 18200) | 1260 (1090 to 1430)  |
| Greece           | Total  | 18900 | 18100 (17700 to 18600) | 796 (340 to 1260)    |
| Greece           | Female | 15600 | 15000 (14600 to 15300) | 649 (318 to 1000)    |
| Greece           | Male   | 22400 | 21400 (21100 to 21700) | 954 (655 to 1250)    |
| Croatia          | Total  | 24700 | 22700 (22100 to 23300) | 1980 (1380 to 2580)  |
| Croatia          | Female | 20600 | 19000 (18500 to 19400) | 1600 (1160 to 2070)  |
| Croatia          | Male   | 29100 | 26700 (26300 to 27200) | 2400 (1960 to 2830)  |
| Hungary          | Total  | 28100 | 25800 (25400 to 26200) | 2320 (1910 to 2740)  |
| Hungary          | Female | 23600 | 21700 (21300 to 22000) | 1920 (1590 to 2240)  |
| Hungary          | Male   | 33100 | 30300 (30100 to 30600) | 2770 (2490 to 3040)  |
| Iceland          | Total  | 11400 | 11000 (10200 to 11800) | 309 (-492 to 1110)   |
| Iceland          | Female | 9970  | 9810 (9330 to 10300)   | 162 (-372 to 641)    |
| Iceland          | Male   | 12700 | 12200 (11600 to 12900) | 455 (-186 to 1080)   |
| Israel           | Total  | 9660  | 9370 (9200 to 9550)    | 288 (110 to 462)     |
| Israel           | Female | 8150  | 8080 (8000 to 8160)    | 71 (-11 to 154)      |
| Israel           | Male   | 11200 | 10700 (10500 to 10800) | 510 (365 to 655)     |
| Italy            | Total  | 18000 | 15500 (14900 to 16200) | 2460 (1830 to 3090)  |
| Italy            | Female | 15500 | 13700 (13300 to 14200) | 1800 (1340 to 2260)  |
| Italy            | Male   | 20600 | 17400 (17000 to 17900) | 3150 (2720 to 3580)  |
| South Korea      | Total  | 11400 | 11500 (11200 to 11700) | -37 (-284 to 210)    |
| South Korea      | Female | 8600  | 8640 (8490 to 8790)    | -43 (-194 to 109)    |
| South Korea      | Male   | 14300 | 14300 (14100 to 14500) | -31 (-223 to 162)    |
| Lithuania        | Total  | 30400 | 26500 (25700 to 27200) | 3940 (3200 to 4680)  |
| Lithuania        | Female | 23100 | 20400 (20100 to 20800) | 2640 (2310 to 2980)  |
| Lithuania        | Male   | 38800 | 33400 (32700 to 34000) | 5430 (4750 to 6070)  |
| Luxembourg       | Total  | 12700 | 12200 (11700 to 12700) | 531 (8 to 1050)      |
| Luxembourg       | Female | 10600 | 10100 (9740 to 10400)  | 568 (241 to 877)     |
| Luxembourg       | Male   | 14800 | 14300 (13900 to 14700) | 507 (83 to 947)      |
| Latvia           | Total  | 29400 | 28200 (27600 to 28900) | 1150 (481 to 1810)   |
| Latvia           | Female | 23300 | 22500 (22100 to 22900) | 768 (376 to 1160)    |
| Latvia           | Male   | 36500 | 34900 (34300 to 35400) | 1620 (1100 to 2170)  |
| Northern Ireland | Total  | 16700 | 15300 (14700 to 15900) | 1350 (733 to 1980)   |
| Northern Ireland | Female | 14700 | 13800 (13500 to 14100) | 932 (604 to 1250)    |
| Northern Ireland | Male   | 18700 | 16900 (16400 to 17400) | 1780 (1290 to 2280)  |
| Netherlands      | Total  | 16100 | 14700 (14500 to 15000) | 1330 (1090 to 1580)  |
| Netherlands      | Female | 14400 | 13500 (13300 to 13600) | 924 (768 to 1070)    |
| Netherlands      | Male   | 17800 | 16000 (15800 to 16200) | 1780 (1580 to 1980)  |
| Norway           | Total  | 12300 | 12400 (12200 to 12500) | -61 (-197 to 74)     |
| Norway           | Female | 11000 | 11000 (10900 to 11100) | -47 (-140 to 47)     |
| Norway           | Male   | 13600 | 13700 (13600 to 13800) | -75 (-169 to 16)     |
| New Zealand      | Total  | 12400 | 13100 (12800 to 13400) | -713 (-1020 to -408) |
| New Zealand      | Female | 10600 | 11200 (11000 to 11500) | -609 (-824 to -391)  |
| New Zealand      | Male   | 14200 | 15000 (14800 to 15300) | -807 (-1030 to -583) |
| Poland           | Total  | 24300 | 21500 (21100 to 21900) | 2800 (2430 to 3170)  |
| Poland           | Female | 18300 | 16400 (16200 to 16600) | 1830 (1630 to 2040)  |
| Poland           | Male   | 30800 | 26900 (26700 to 27200) | 3830 (3540 to 4120)  |

|               |        |       |                        |                     |
|---------------|--------|-------|------------------------|---------------------|
| Portugal      | Total  | 19000 | 17400 (17100 to 17700) | 1590 (1260 to 1920) |
| Portugal      | Female | 15200 | 14000 (13700 to 14200) | 1260 (995 to 1530)  |
| Portugal      | Male   | 23200 | 21200 (21000 to 21400) | 1950 (1760 to 2150) |
| Russia        | Total  | 34300 | 28500 (28000 to 29100) | 5810 (5280 to 6340) |
| Russia        | Female | 26000 | 21300 (21100 to 21500) | 4760 (4530 to 4990) |
| Russia        | Male   | 43900 | 36900 (36400 to 37400) | 7020 (6550 to 7480) |
| Scotland      | Total  | 21500 | 19800 (19200 to 20400) | 1710 (1140 to 2260) |
| Scotland      | Female | 18500 | 17500 (17200 to 17800) | 925 (613 to 1240)   |
| Scotland      | Male   | 24700 | 22100 (21700 to 22600) | 2540 (2100 to 3000) |
| Slovakia      | Total  | 22200 | 20400 (20000 to 20800) | 1850 (1470 to 2230) |
| Slovakia      | Female | 17600 | 16100 (15900 to 16300) | 1540 (1300 to 1780) |
| Slovakia      | Male   | 27100 | 24900 (24600 to 25200) | 2180 (1900 to 2460) |
| Slovenia      | Total  | 18700 | 16800 (16300 to 17200) | 1910 (1500 to 2340) |
| Slovenia      | Female | 15700 | 13900 (13600 to 14100) | 1810 (1560 to 2060) |
| Slovenia      | Male   | 21700 | 19700 (19300 to 20000) | 2020 (1690 to 2360) |
| Sweden        | Total  | 14500 | 13400 (13200 to 13600) | 1140 (938 to 1340)  |
| Sweden        | Female | 12800 | 12100 (11900 to 12200) | 772 (640 to 901)    |
| Sweden        | Male   | 16200 | 14700 (14600 to 14900) | 1510 (1360 to 1660) |
| Taiwan        | Total  | 15200 | 15600 (15300 to 15900) | -410 (-722 to -92)  |
| Taiwan        | Female | 10900 | 11200 (11000 to 11300) | -247 (-413 to -81)  |
| Taiwan        | Male   | 19600 | 20100 (19900 to 20400) | -572 (-842 to -312) |
| United States | Total  | 21800 | 18400 (18200 to 18600) | 3380 (3160 to 3610) |
| United States | Female | 17800 | 15300 (15200 to 15500) | 2430 (2320 to 2550) |
| United States | Male   | 25900 | 21600 (21400 to 21800) | 4350 (4170 to 4530) |

Supplementary Table S4: Years of life lost per 100,000 in people <65 compared with people ≥65 years

| Country/ region  | Total                  |                           | Female                   |                           | Male                   |                           |
|------------------|------------------------|---------------------------|--------------------------|---------------------------|------------------------|---------------------------|
|                  | <65y                   | ≥65y                      | <65y                     | ≥65y                      | <65y                   | ≥65y                      |
| Russia           | 3290<br>(2780 to 3810) | 19600<br>(17800 to 21500) | 2340<br>(2180 to 2520)   | 14900<br>(14000 to 15900) | 4290<br>(3830 to 4740) | 29000<br>(27300 to 30800) |
| Bulgaria         | 2650<br>(2220 to 3070) | 15600<br>(11300 to 20000) | 1650<br>(1430 to 1860)   | 9960<br>(6110 to 13900)   | 3630<br>(3260 to 3990) | 24000<br>(22000 to 25800) |
| Lithuania        | 2580<br>(1790 to 3410) | 9400<br>(7770 to 11100)   | 1440<br>(1150 to 1720)   | 6330<br>(5280 to 7350)    | 3740<br>(2990 to 4490) | 15400<br>(14100 to 16900) |
| United States    | 2390<br>(2280 to 2510) | 8260<br>(7040 to 9510)    | 1430<br>(1380 to 1480)   | 6910<br>(6300 to 7470)    | 3350<br>(3250 to 3450) | 9940<br>(8900 to 11000)   |
| Estonia          | 1340<br>(750 to 1930)  | 1300<br>(-863 to 3510)    | 931<br>(832 to 1030)     | 941<br>(349 to 1550)      | 1750<br>(1200 to 2310) | 2020<br>(-190 to 4240)    |
| Scotland         | 1310<br>(954 to 1670)  | 3380<br>(956 to 5840)     | 617<br>(413 to 826)      | 2100<br>(762 to 3430)     | 2010<br>(1720 to 2310) | 4940<br>(2810 to 7000)    |
| Chile            | 1160<br>(733 to 1620)  | 5760<br>(2310 to 9200)    | 646<br>(386 to 909)      | 3640<br>(1640 to 5710)    | 1680<br>(1320 to 2040) | 8560<br>(5760 to 11400)   |
| Canada           | 1020<br>(892 to 1150)  | 1600<br>(298 to 2920)     | 472<br>(403 to 540)      | 1270<br>(626 to 1900)     | 1560<br>(1450 to 1680) | 2000<br>(814 to 3150)     |
| Hungary          | 808<br>(445 to 1180)   | 8430<br>(6990 to 9820)    | 427<br>(178 to 678)      | 6750<br>(5600 to 7940)    | 1190<br>(913 to 1470)  | 11200<br>(10300 to 12000) |
| Poland           | 777<br>(477 to 1080)   | 12000<br>(10500 to 13500) | 232<br>(113 to 353)      | 7830<br>(7000 to 8670)    | 1320<br>(1040 to 1580) | 18200<br>(17000 to 19400) |
| England & Wales  | 749<br>(567 to 929)    | 5700<br>(3750 to 7630)    | 472<br>(353 to 592)      | 4170<br>(2940 to 5510)    | 1030<br>(891 to 1160)  | 7500<br>(6070 to 8910)    |
| Northern Ireland | 681<br>(345 to 1020)   | 4650<br>(1310 to 7890)    | 411<br>(268 to 557)      | 3310<br>(1620 to 4940)    | 953<br>(652 to 1260)   | 6290<br>(3500 to 9180)    |
| Czech Republic   | 658<br>(427 to 893)    | 9280<br>(7800 to 10700)   | 405<br>(287 to 520)      | 6560<br>(5420 to 7710)    | 904<br>(706 to 1110)   | 13000<br>(12100 to 14000) |
| Italy            | 613<br>(301 to 908)    | 8560<br>(6000 to 11100)   | 288<br>(107 to 477)      | 6210<br>(4460 to 7930)    | 936<br>(692 to 1180)   | 11600<br>(9770 to 13400)  |
| Slovakia         | 602<br>(329 to 873)    | 8100<br>(6260 to 9930)    | 411<br>(305 to 514)      | 6170<br>(4990 to 7360)    | 794<br>(554 to 1040)   | 11000<br>(9490 to 12500)  |
| Iceland          | 571<br>(-150 to 1260)  | -1220<br>(-4910 to 2710)  | 571<br>(127 to 1020)     | -2050<br>(-4280 to 190)   | 566<br>(35.2 to 1100)  | -241<br>(-3340 to 2800)   |
| Latvia           | 555<br>(-114 to 1190)  | 3480<br>(1400 to 5600)    | 292<br>(35.7 to 541)     | 2160<br>(792 to 3510)     | 833<br>(274 to 1400)   | 6200<br>(4430 to 7920)    |
| Spain            | 539<br>(293 to 775)    | 7510<br>(5590 to 9400)    | 328<br>(236 to 421)      | 5970<br>(4600 to 7330)    | 749<br>(530 to 963)    | 9520<br>(8130 to 10900)   |
| Portugal         | 531<br>(373 to 689)    | 5300<br>(3930 to 6670)    | 271<br>(170 to 372)      | 4330<br>(3260 to 5410)    | 804<br>(684 to 926)    | 6660<br>(5820 to 7520)    |
| Croatia          | 518<br>(159 to 873)    | 7490<br>(4930 to 10100)   | 341<br>(195 to 487)      | 5560<br>(3810 to 7320)    | 695<br>(378 to 1020)   | 10300<br>(8420 to 12300)  |
| Finland          | 429<br>(251 to 610)    | -84.6<br>(-890 to 716)    | 59.9<br>(-39.6 to 162)   | 120<br>(-408 to 651)      | 785<br>(640 to 937)    | -345<br>(-990 to 283)     |
| Austria          | 359<br>(142 to 581)    | 4930<br>(3700 to 6180)    | 183<br>(81.9 to 281)     | 3730<br>(2900 to 4560)    | 536<br>(338 to 737)    | 6510<br>(5550 to 7480)    |
| Belgium          | 358<br>(173 to 534)    | 9110<br>(7880 to 10300)   | 106<br>(-4.47 to 216)    | 7670<br>(6730 to 8600)    | 606<br>(460 to 749)    | 10900<br>(10100 to 11800) |
| Sweden           | 224<br>(122 to 329)    | 4800<br>(3920 to 5700)    | 114<br>(37.6 to 192)     | 3170<br>(2610 to 3700)    | 333<br>(258 to 406)    | 6680<br>(5960 to 7390)    |
| Netherlands      | 217<br>(85.5 to 348)   | 5940<br>(4770 to 7130)    | -3.51<br>(-93.2 to 92.5) | 4450<br>(3860 to 5080)    | 442<br>(344 to 539)    | 7790<br>(6780 to 8770)    |
| Slovenia         | 209<br>(-98.2 to 510)  | 8600<br>(6880 to 10300)   | 94.7<br>(-25.7 to 220)   | 7480<br>(6470 to 8490)    | 322<br>(47.8 to 597)   | 10100<br>(8650 to 11600)  |
| Switzerland      | 199<br>(-76.3 to 467)  | 5030<br>(3180 to 6860)    | 13.4<br>(-113 to 142)    | 3460<br>(2710 to 4230)    | 394<br>(161 to 631)    | 7010<br>(5280 to 8730)    |
| Luxembourg       | 156                    | 2730                      | 201                      | 2490                      | 120                    | 3060                      |

|             |                |                  |                 |                  |                 |                  |
|-------------|----------------|------------------|-----------------|------------------|-----------------|------------------|
|             | (-291 to 599)  | (228 to 5210)    | (-27.8 to 436)  | (877 to 3990)    | (-256 to 497)   | (1040 to 5140)   |
| South Korea | 108            | -839             | 198             | -1180            | 22.6            | -382             |
| Greece      | (-58.3 to 275) | (-2130 to 482)   | (122 to 274)    | (-1990 to -359)  | (-126 to 175)   | (-1450 to 695)   |
|             | 107            | 3190             | 143             | 2240             | 74.6            | 4400             |
| Germany     | (-55 to 270)   | (1230 to 5190)   | (84.7 to 202)   | (788 to 3600)    | (-78.1 to 230)  | (3040 to 5750)   |
|             | 82.8           | 2300             | -48.3           | 1200             | 210             | 3710             |
| France      | (-248 to 419)  | (-599 to 5310)   | (-237 to 135)   | (-1040 to 3500)  | (-64 to 493)    | (1790 to 5720)   |
|             | 81.4           | 4390             | 24.8            | 2990             | 142             | 6250             |
| Norway      | (-57.4 to 230) | (3390 to 5370)   | (-42.2 to 92.9) | (2330 to 3680)   | (15.5 to 272)   | (5490 to 6990)   |
|             | 43.2           | -551             | 62.1            | -514             | 25.2            | -593             |
| Israel      | (-42.2 to 132) | (-1210 to 106)   | (-2.24 to 130)  | (-927 to -95.6)  | (-30 to 80.7)   | (-1100 to -96.4) |
|             | -17.1          | 2540             | -93.7           | 1160             | 59.1            | 4250             |
| New Zealand | (-121 to 88.3) | (1310 to 3780)   | (-137 to -48.9) | (585 to 1730)    | (-32.8 to 153)  | (3160 to 5340)   |
|             | -108           | -3930            | -28.3           | -3520            | -179            | -4360            |
| Taiwan      | (-282 to 58.7) | (-5720 to -2170) | (-153 to 97.5)  | (-4610 to -2370) | (-295 to -62.9) | (-5710 to -3020) |
|             | -110           | -2070            | 62.7            | -1820            | -279            | -2360            |
|             | (-368 to 128)  | (-3620 to -570)  | (-44.1 to 165)  | (-2660 to -931)  | (-496 to -54.2) | (-3630 to -1100) |

Supplementary Figure S3: Life expectancy at birth, 2005-2020

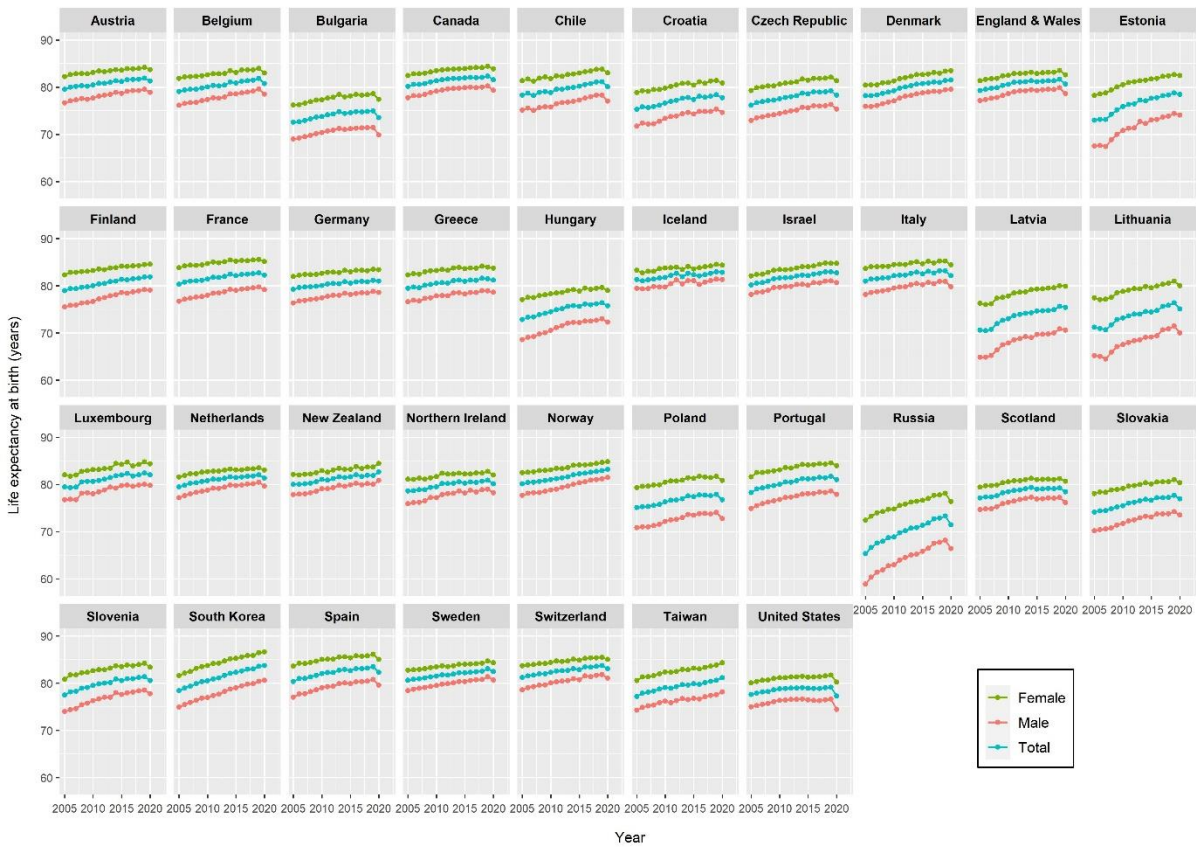

## Supplementary Figure S4: Years of life lost (per 100,000) by age and sex, 2005-2020

Fig. S4(A): Men

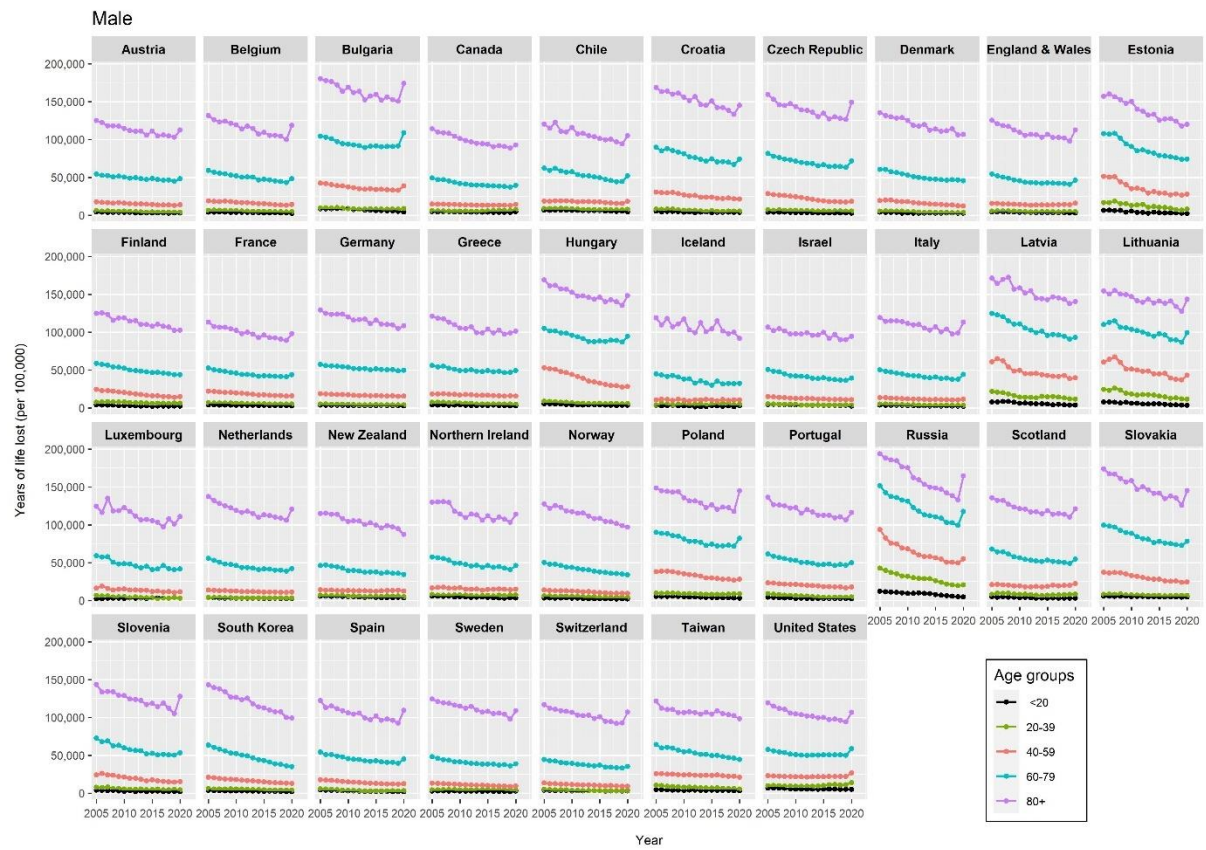

Fig. S4(B): Women

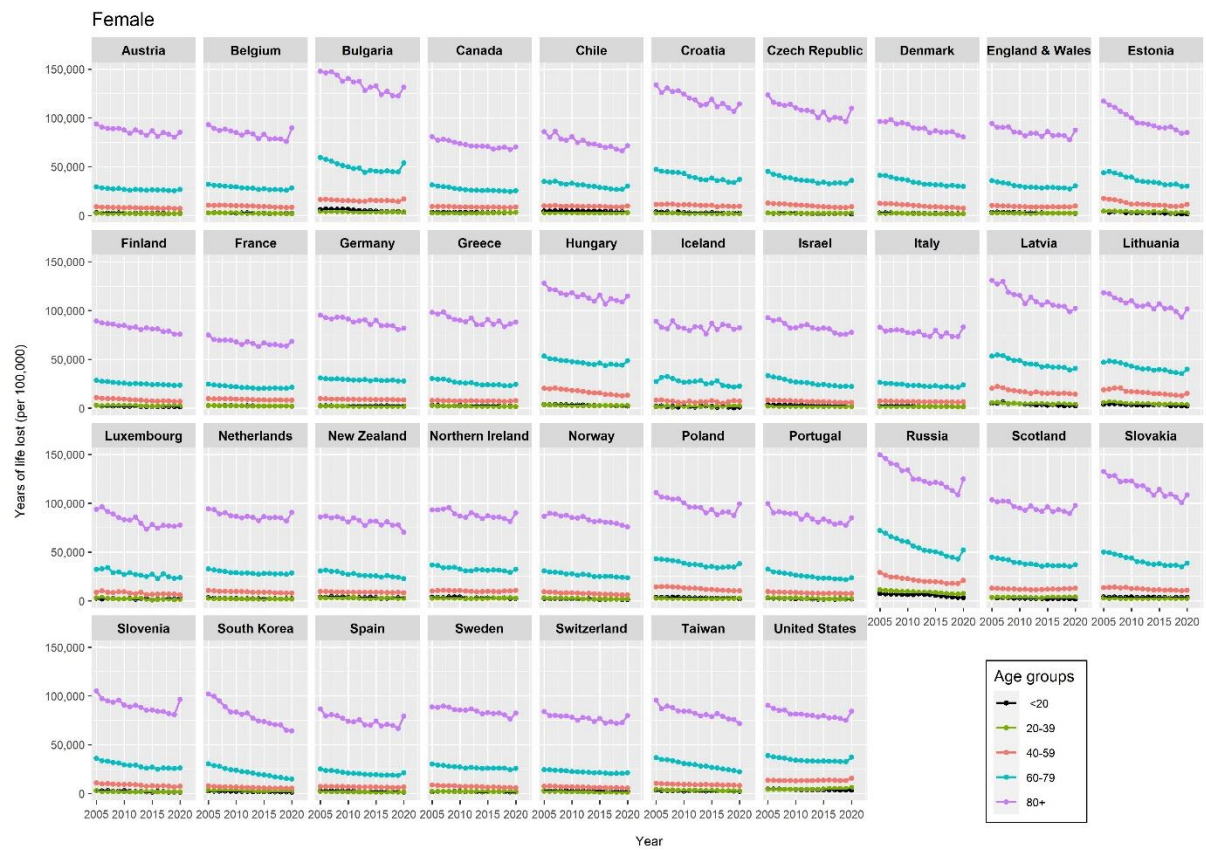

### Supplementary references:

- 1 O'Driscoll M, Ribeiro Dos Santos G, Wang L, *et al.* Age-specific mortality and immunity patterns of SARS-CoV-2. *Nature* 2021;**590**:140–5. doi:10.1038/s41586-020-2918-0
- 2 Modig K, Ahlbom A, Ebeling M. Excess mortality from COVID-19: weekly excess death rates by age and sex for Sweden and its most affected region. *Eur J Public Health* 2021;**31**:17–22. doi:10.1093/eurpub/ckaa218
- 3 Sinnathamby MA, Whitaker H, Coughlan L, *et al.* All-cause excess mortality observed by age group and regions in the first wave of the COVID-19 pandemic in England. *Eurosurveillance* 2020;**25**:2001239. doi:10.2807/1560-7917.ES.2020.25.28.2001239
- 4 Preston SH, Heuveline P, Guillot M. *Demography: measuring and modeling population processes*. Malden, MA: : Blackwell Publishers 2001.
- 5 Coale AJ, Demeny PG, Vaughan B. *Regional model life tables and stable populations*. 2nd ed. New York: : Academic Press 1983.
- 6 Chiang CL. *The Life Table and Its Applications*. R.E. Krieger Publishing Company 1984.
